# Supplementary material
Source: PubMed Central journal article supplement (PMC9422800)
Supplement: Suppl_FigS1.pdf [file Suppl_FigS1.pdf]

- ◆ (Patient #1) High CTE, limbic TDP-43 + HS
- ◆ (Patient #9) High CTE, FTLN-TDP Type B + MND
- ◆ (Patient #2) High CTE, limbic TDP-43 + HS
- ◆ (Patient #7) High CTE, High ADNC, limbic TDP-43 + HS
- ◆ (Patient #3) Low CTE, High ADNC, limbic TDP-43 + HS
- ◆ (Patient #6) PART
- ◆ (Patient #4) FTLN-tau (CBD), FTLN-TDP (U) + HS
- ◆ (Patient #8) FTLN-TDP Type C, focal tau astroglipathy
- ◆ (Patient #5) High ADNC

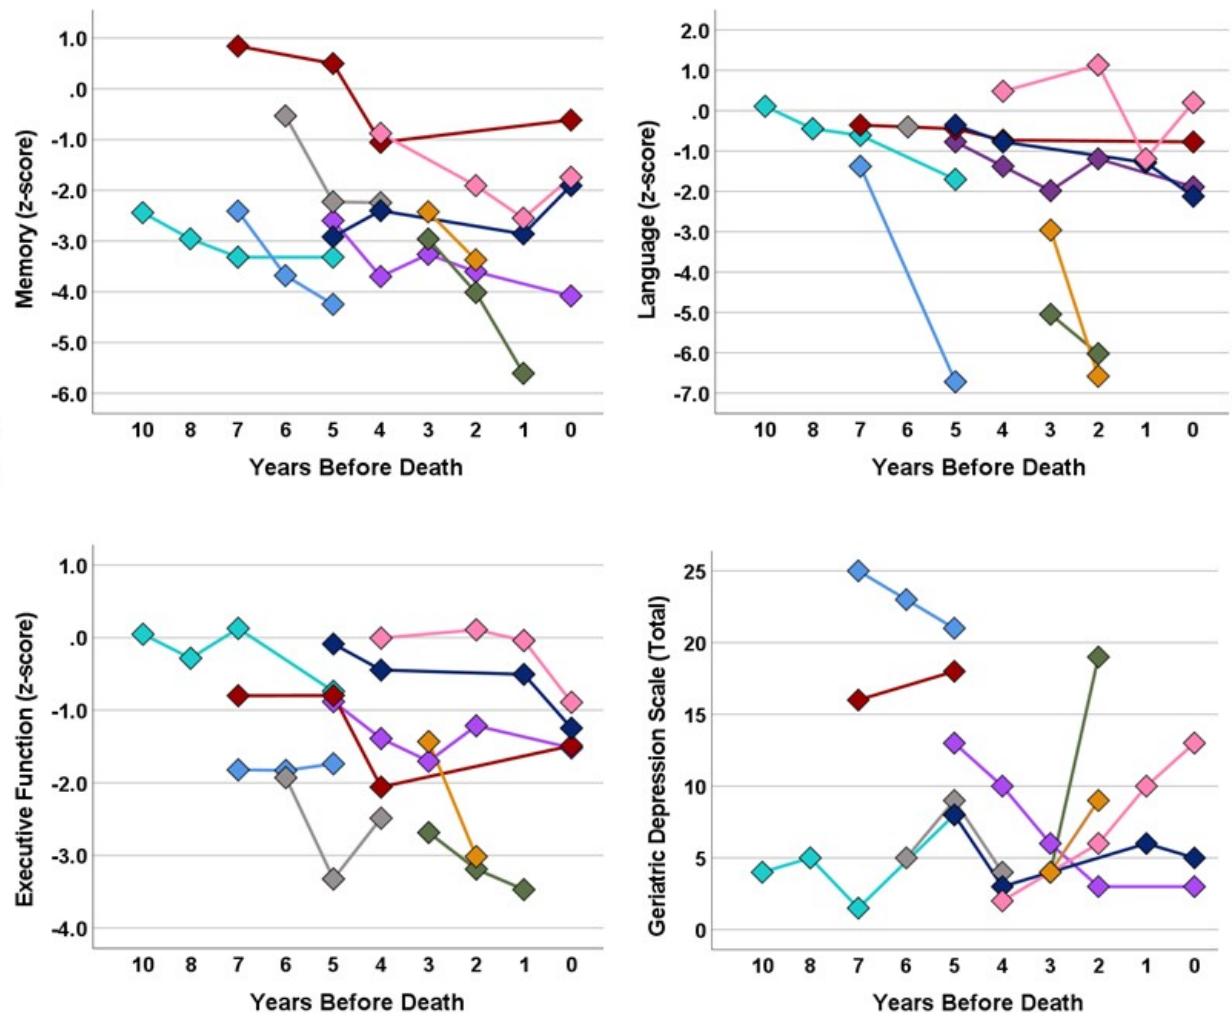

**Supplemental Figure 1:** Longitudinal neuropsychological test data for each of the nine patients with RHI and TES. Data are shown as z-scores for 3 cognitive domains – memory, executive functioning, and language. Longitudinal self-reported depression symptoms are also shown (Geriatric Depression Scale). Neuropathological features for each patient are listed along with the specific “Patient #,” which corresponds with additional clinical history provided in Table 1.
