# Supplementary material
Source: PubMed Central journal article supplement (PMC9422800)
Supplement: Suppl_FigS2.pdf [file Suppl_FigS2.pdf]

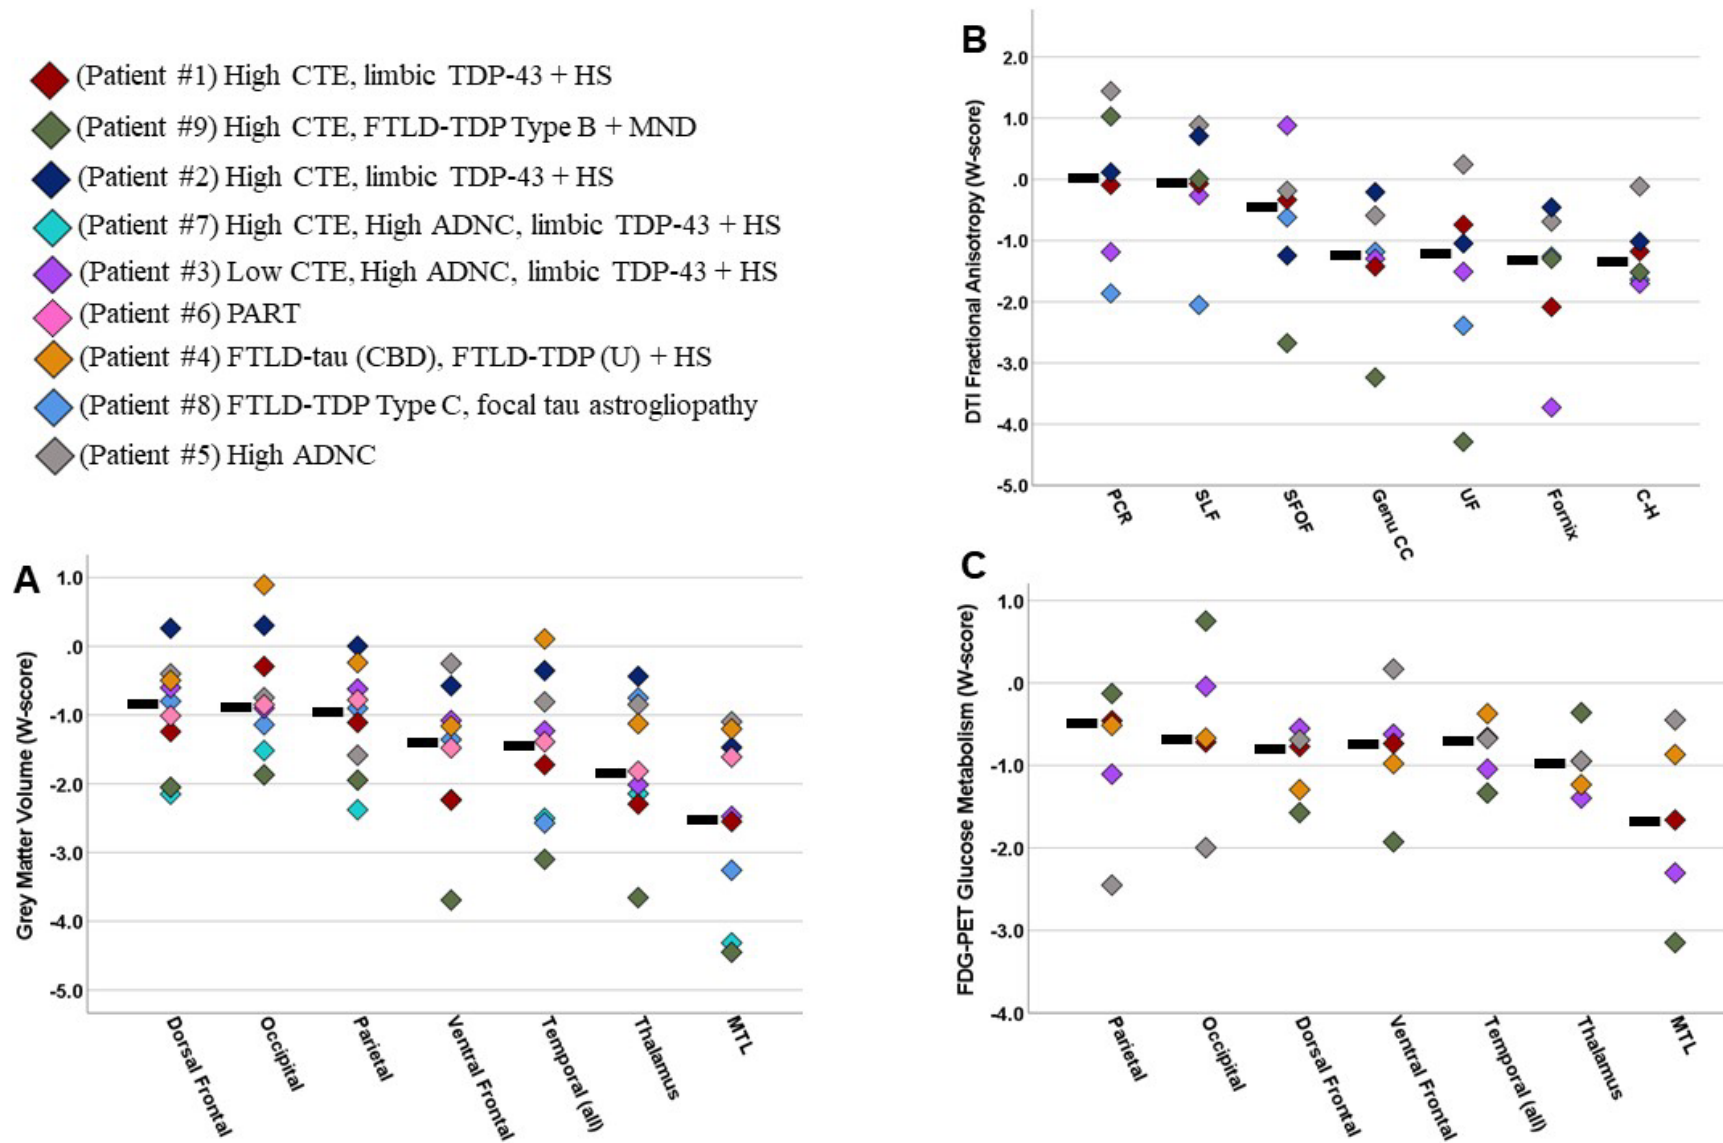

**Supplemental Figure 2:** Cross-sectional, region of interest-based W-scores for the nine autopsy series patients based on the (A) structural MRI obtained closest to death (N = 9; mean  $2.7 \pm 2.6$  years before death, range 0-6 years) as well as (B) diffusion tensor imaging (N = 6; mean  $3.7 \pm 1.9$  years before death, range 1-6 years) and (C) FDG-PET (N = 5; mean  $4.3 \pm 1.2$  years before death, range 3-6 years). Black bars represent the group median for the region of interest. Neuropathological features for each patient are shown along with the specific “Patient #,” which corresponds with additional clinical history provided in Table 1. Abbrev: C-H = cingulum-hippocampus bundle, genu CC = genu of the corpus callosum, MTL = medial temporal lobe, PCR = posterior corona radiata, SFOF = superior fronto-occipital fasciculus, SLF = superior longitudinal fasciculus, UF = uncinata fasciculus
