# Supplementary material
Source: PubMed Central journal article supplement (PMC9422800)
Supplement: Suppl_FigS3.pdf [file Suppl_FigS3.pdf]

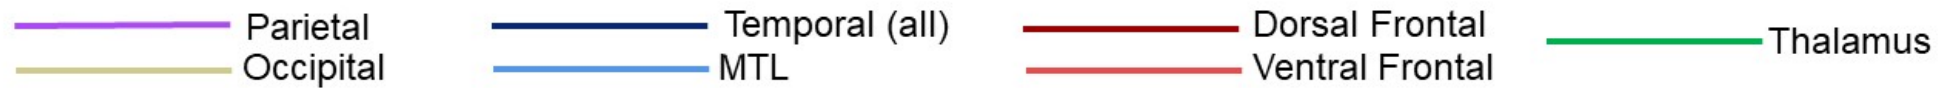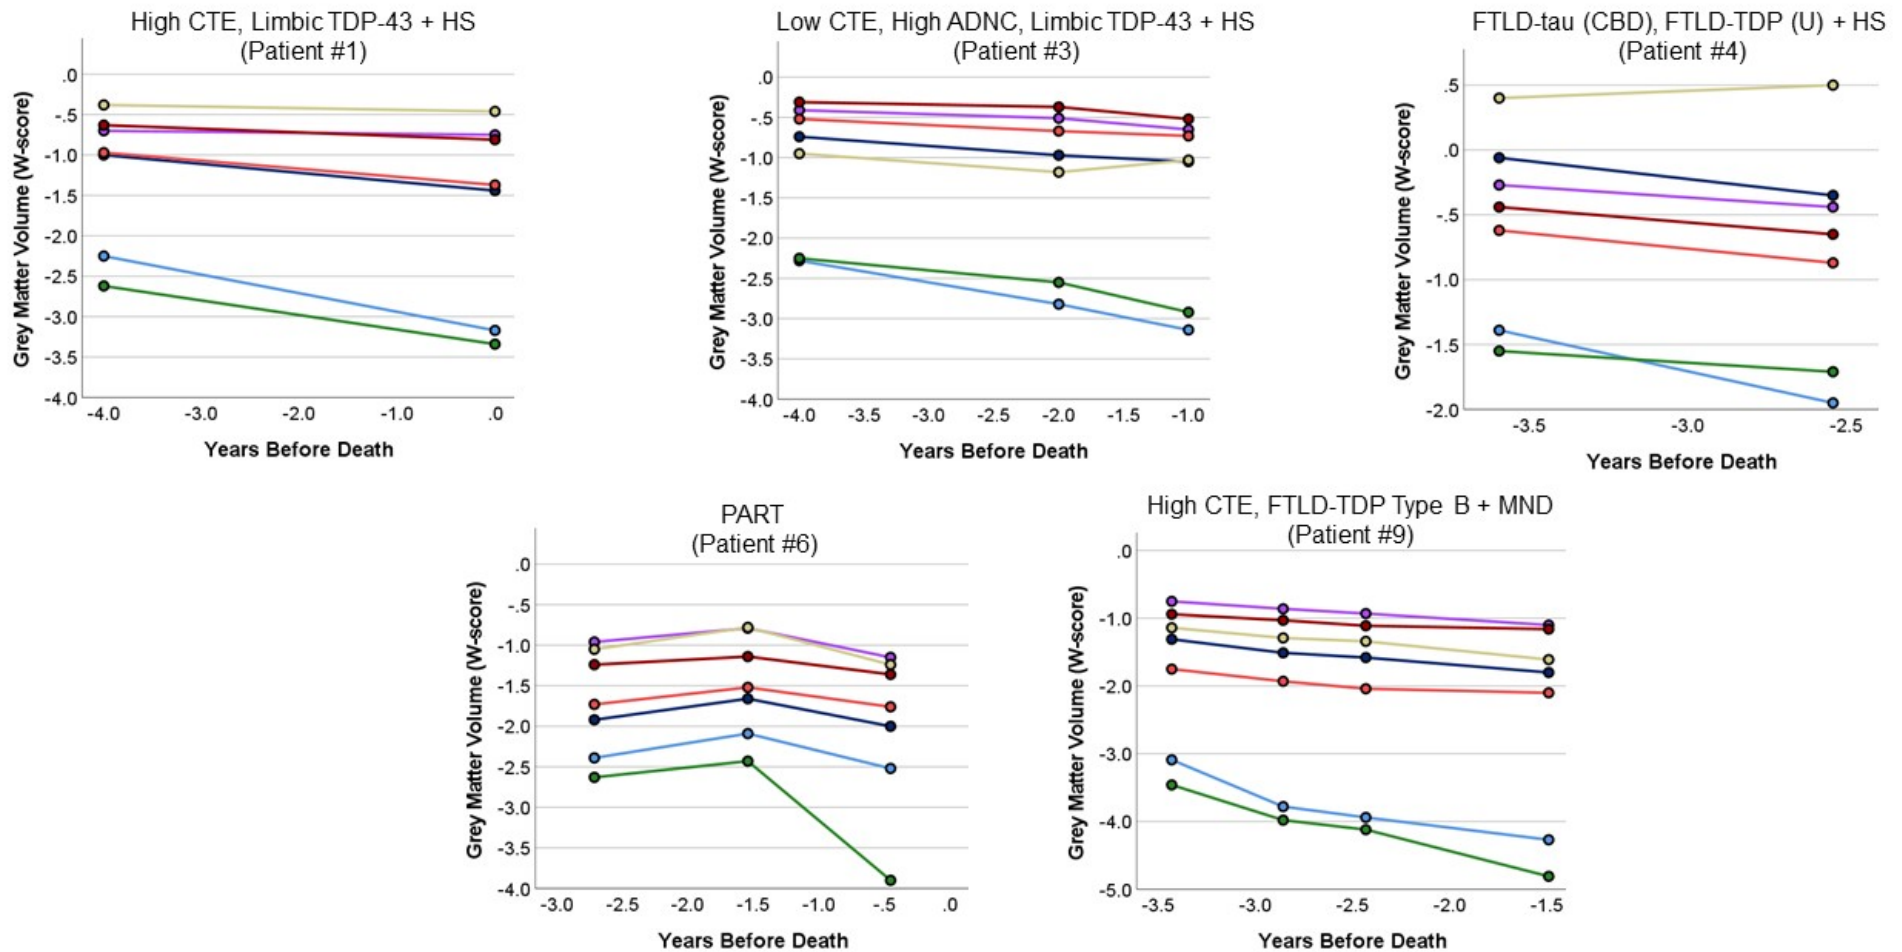

**Supplemental Figure 3:** Longitudinal grey matter volumes for 5 patients who underwent multiple antemortem brain scans. Data represent within-patient changes in the mean W-score for each of seven ROIs. Some patients underwent MRI acquisition on two different scanners in the course of their research participation. For visualization of longitudinal data, each patient's W-scores were derived based on a reference sample scanned on the same scanner as the patient's first evaluation to avoid artificial W-score fluctuations reflecting a change in scanner and reference group longitudinally. Neuropathological features for each patient are shown along with the "Patient #," which corresponds with clinical history provided in Table 1.
