# Supplementary material
Source: PubMed Central journal article supplement (PMC9422800)
Supplement: Suppl_TableS2.pdf [file Suppl_TableS2.pdf]

| Patient # | DTI | FDG-PET | APOE Genotype | Age at First Scan (sMRI) | Age at Last Scan (All)         | Age at Last Evaluation of Functional Status | Functional Status Closest to Death                             | Retrospective Functional Status (Postmortem) | Age at Death | Estimated Cause(s) of Death                                                                                           |
|-----------|-----|---------|---------------|--------------------------|--------------------------------|---------------------------------------------|----------------------------------------------------------------|----------------------------------------------|--------------|-----------------------------------------------------------------------------------------------------------------------|
| 1         | Y   | Y       | E3/E3         | 68                       | sMRI: 72<br>DTI: 72<br>PET: 68 | 68                                          | CDR Global: 0.5<br>CDR Box Score: 3.5<br>FTLD Box Score: 4.5   | CDR Global: 0.5<br>CDR Box Score: 3.5        | 72           | 1) acute respiratory failure<br>2) Seizure<br>3) Diastolic congestive heart failure                                   |
| 2         | Y   | N       | E3/E3         | 69                       | sMRI: 69<br>DTI: 69<br>PET: na | 73                                          | CDR Global: 0.5<br>CDR Box Score: 2.5<br>FTLD Box Score: 2.5   | CDR Global: 2.0<br>CDR Box Score: 10.5       | 74           | 1) acute blood loss/anemia<br>2) uncontrolled seizures<br>3) glioblastoma                                             |
| 3         | Y   | Y       | E3/E3         | 74                       | sMRI: 78<br>DTI: 77<br>PET: 74 | 78                                          | CDR Global: 1.0<br>CDR Box Score: 4.5<br>FTLD Box Score: n/a   | n/a                                          | 79           | n/a                                                                                                                   |
| 4         | N   | Y       | E3/E3         | 46                       | sMRI: 47<br>DTI: na<br>PET: 47 | 47                                          | CDR Global: 1.0<br>CDR Box Score: 6.5<br>FTLD Box Score: 9.5   | n/a                                          | 49           | n/a                                                                                                                   |
| 5         | Y   | Y       | E3/E4         | 51                       | sMRI: 51<br>DTI: 51<br>PET: 51 | 55                                          | CDR Global: 1.0<br>CDR Box Score: 4.5<br>FTLD Box Score: n/a   | CDR Global: 1.0<br>CDR Box Score: 9.5        | 58           | 1) complications of dementia<br>2) difficulty swallowing<br>3) terminal fever                                         |
| 6         | N   | N       | n/a           | 78                       | sMRI: 81<br>DTI: na<br>PET: 81 | 81                                          | CDR Global: 0.5<br>CDR Box Score: 2.0<br>FTLD Box Score: 2.0   | n/a                                          | 81           | n/a                                                                                                                   |
| 7         | N   | N       | E4/E4         | 78                       | sMRI: 78<br>DTI: na<br>PET: na | 83                                          | CDR Global: 2.0<br>CDR Box Score: 15.0<br>FTLD Box Score: n/a  | CDR Global: 2.0<br>CDR Box Score: 12.0       | 84           | 1) cardiac arrest<br>2) respiratory failure<br>3) atherosclerotic heart disease<br>4) difficulty swallowing/breathing |
| 8         | Y   | N       | E2/E3         | 65                       | sMRI: 65<br>DTI: 65<br>PET: na | 65                                          | CDR Global: 2.0<br>CDR Box Score: 13.0<br>FTLD Box Score: 17.0 | CDR Global: 3.0<br>CDR Box Score: 18.0       | 70           | 1) cerebral anoxia<br>2) cardiac arrest<br>3) arteriosclerosis<br>4) Pneumonia/difficulty swallowing                  |
| 9*        | Y   | Y       | E2/E3         | 55                       | sMRI: 57<br>DTI: 56<br>PET: 55 | 58                                          | CDR Global: 2.0<br>CDR Box Score: 12.0<br>FTLD Box Score: n/a  | n/a                                          | 59           | n/a                                                                                                                   |

**Supplemental Table 2:** Available neuroimaging data for each of the nine patients with RHI and TES along with Apolipoprotein E genotype, ages of first (structural MRI) and most recently acquired scans (all modalities), age of most recent clinical evaluation that included an assessment of functional status, functional status closest to death (Clinical Dementia Rating [CDR] scale global score, CDR sum of boxes, and CDR sum of boxes plus behavior and language [FTLD module] box score), retroactive assessment of functional status during the final three months of life, and estimated causes/contributors to the patient's death. All participants underwent at least one structural MRI.

\*Additional genetic testing for Patient #9 revealed a variant of the neuronal ceroid lipofuscinosis gene major facilitator superfamily domain-containing protein 8 (MFSD8; variant rs11098943). This gene encodes a lysosomal transmembrane protein of unknown structure and function but has a suggested role in small-solute transport across the lysosomal membrane (Siintola et al., 2007). Rare MFSD8 variant enrichment has been associated with greater risk for frontotemporal lobar degeneration (Geier et al., 2019).
